# Supplementary material
Source: MDPI journal article supplement (https://www.mdpi.com/2673-8007/3/2/31)
Supplement: s1 [file s1]

## Supplementary

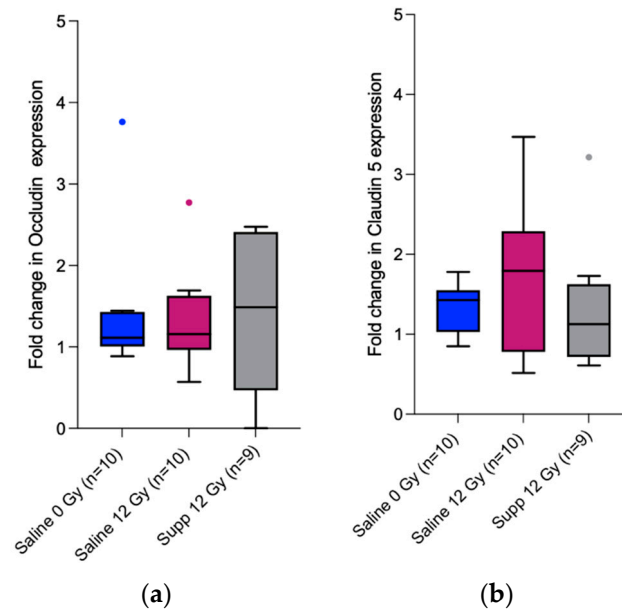

**Figure S1:** Boxplots showing the fold change in (a) Occludin and (b) Claudin 5 protein expression in the ileum following pelvic (sham-)irradiation at PID1 for the three groups with  $n \geq 9$  per group in comparison to a reference sample from the saline sham-irradiated group.
